# Supplementary material for: Tumour hypoxia determines the potential of combining mTOR and autophagy inhibitors to treat mammary tumours
Source: PubMed Central journal article supplement — Br J Cancer. 2013 Oct 24;109(10):2597–606. doi: 10.1038/bjc.2013.644 (PMC3833227; doi:10.1038/bjc.2013.644), 2013-10-24
Supplement: bjc2013644x1.pdf [file bjc2013644x1.pdf]

# Supplementary Figure 1

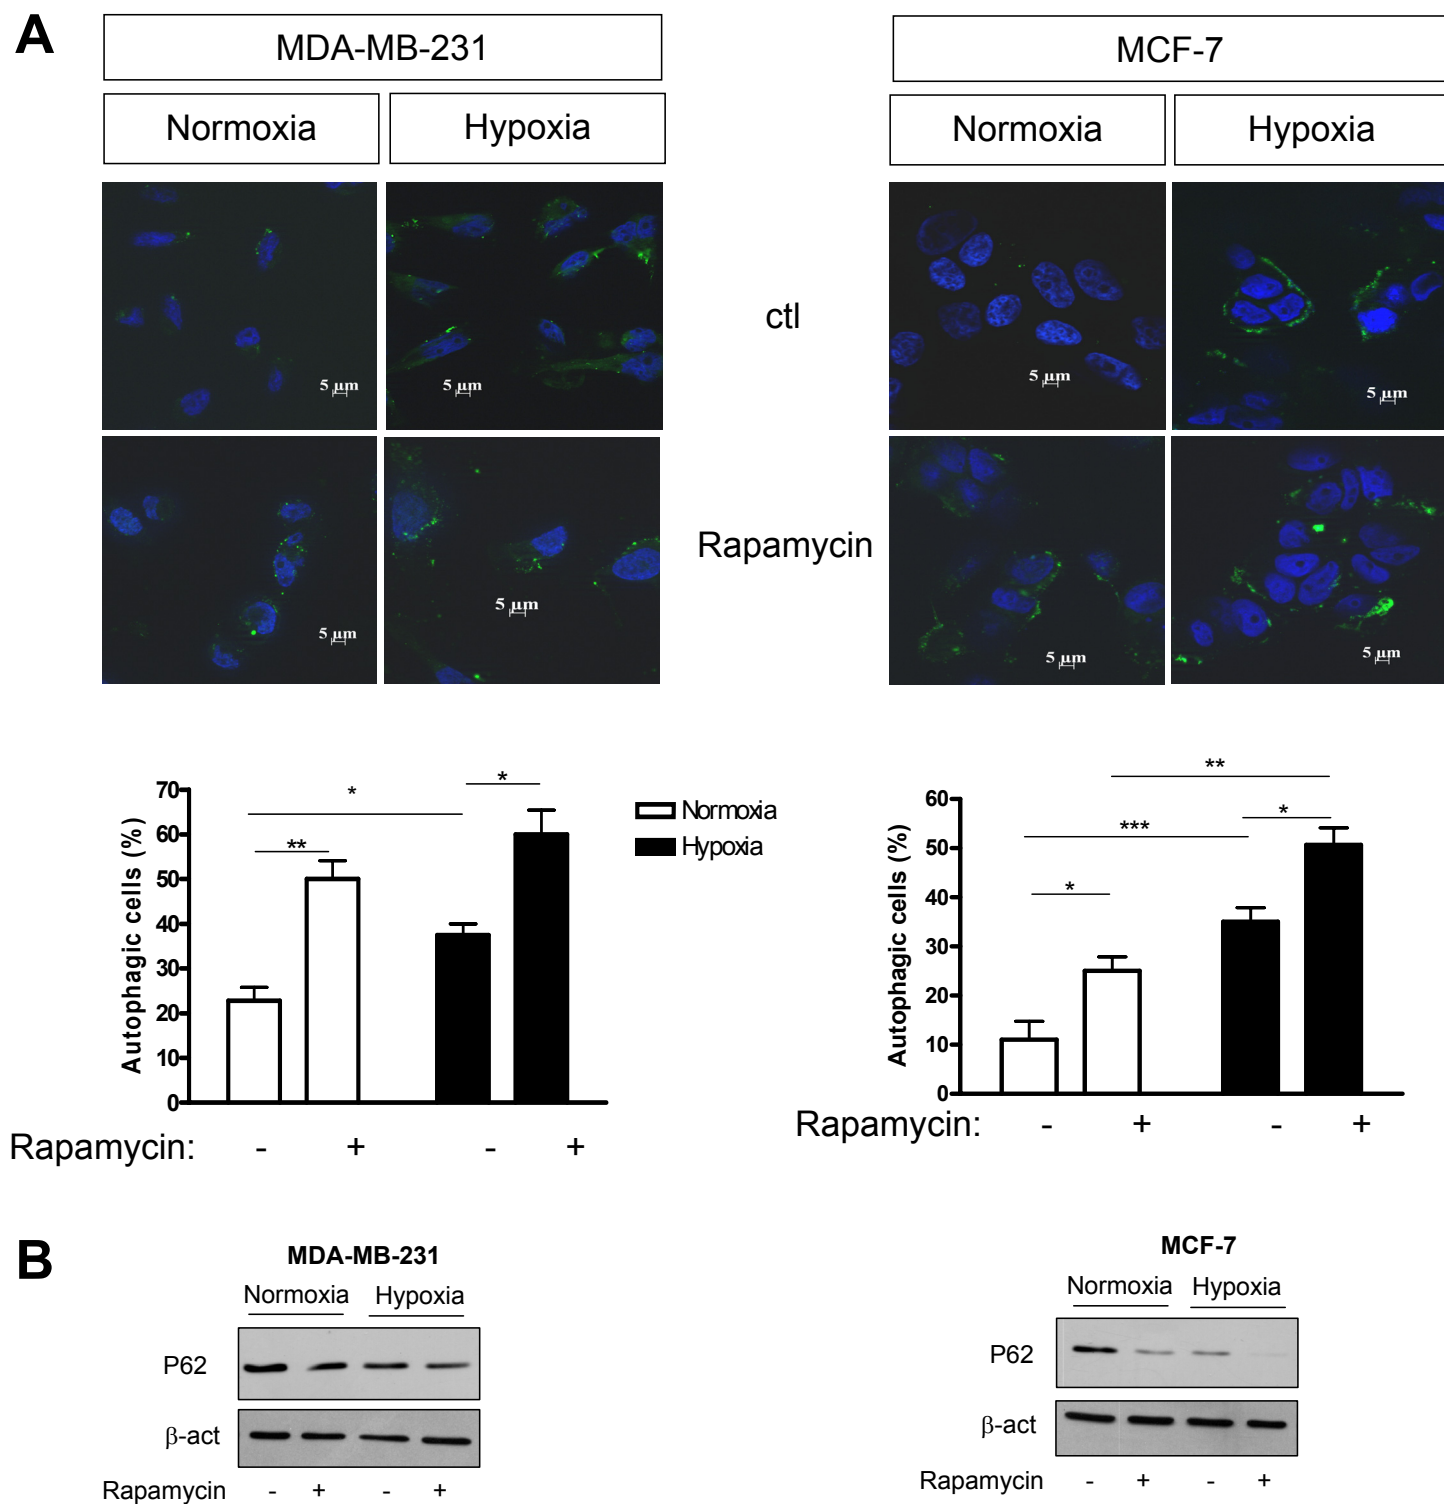

**Supplementary Figure 1. Hypoxia stimulates autophagy in MCF-7 but not in MDA-MB-231 cells.** (A) Representative immunofluorescence detection of the fluorogenic protease substrate DQ Green BSA to image the formation of the autolysosome (green staining) in MDA-MB-231 and MCF-7 cells after 48h-treatment with 100 nM rapamycin under normoxia or hypoxia. Bar graphs represent the proportion of autophagic cells (%) (\*  $p < 0.05$ , \*\*  $p < 0.01$ ,  $n = 3$ ). (B) Representative p62 immunoblotting experiments ( $n = 3$ ) are presented for MDA-MB-231 and MCF-7 cells exposed for 48 hours to normoxia or hypoxia in the presence of 100 nM rapamycin; the reduction in p62 immunoblotting signal reflects autophagic degradation of p62.

## Supplementary Figure 2

**A.**

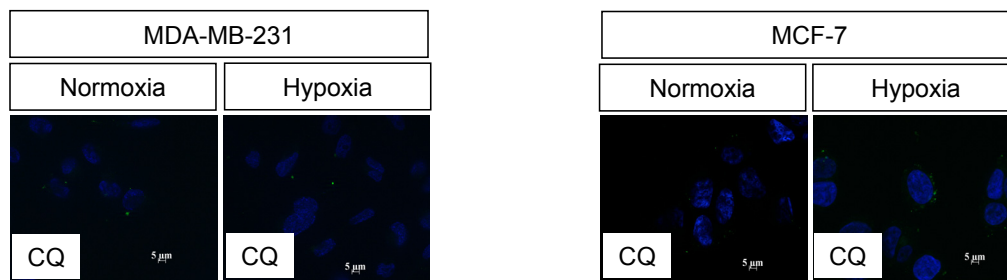

**B.**

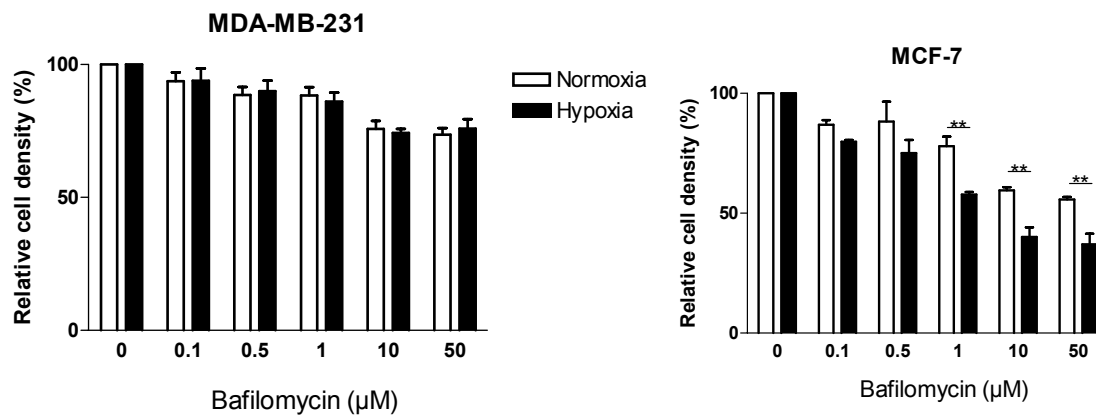

**Supplementary Figure 2. Effects of the autophagy inhibitors chloroquin and bafilomycin (A)** Representative immunofluorescence detection of the fluorogenic protease substrate DQ Green BSA to image the formation of the autolysosome (green staining) in MDA-MB-231 and MCF-7 cells after 48h-treatment with 5 μM CQ under normoxia or hypoxia; see untreated conditions in Suppl. Figure 1A. **(B)** Bar graphs represent the extent of MDA-MB-231 and MCF-7 cell proliferation (expressed as % of untreated cells) after 48 h-treatment with increasing concentrations of bafilomycin (\*\* p<0.01, n= 3). Note that bafilomycin reduces the proliferation of hypoxic MCF-7 cells but not that of MDA-MB231 cells.

## Supplementary Figure 3

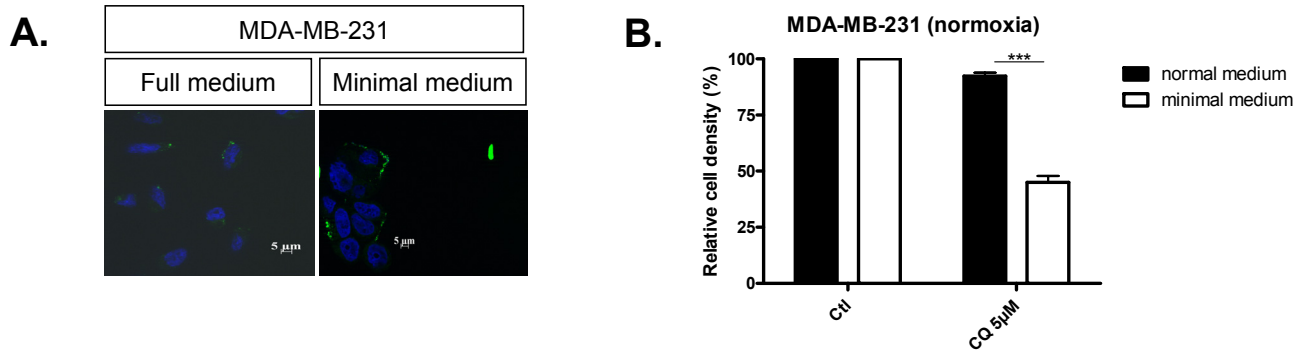

**Supplementary Figure 3. Autophagy can be induced in MDA-MB-231 cells in response to the exposure to minimal medium (A)** Representative immunofluorescence detection of the fluorogenic protease substrate DQ Green BSA to image the formation of the autolysosome (green staining) in MDA-MB-231 cells after 48 h-exposure to amino acid-deprived medium (minimal medium) under normoxia. **(B)** Bar graph represents the extent of MDA-MB-231 cell proliferation (expressed as % of untreated cells) after 48 h-exposure to amino acid-deprived medium (minimal medium) with or without chloroquin (\*\*\*)  $p < 0.001$ ,  $n = 3$ ).
